# Supplementary material for: Association of Eating Pattern, Chronotype, and Social Jetlag: A Cross-Sectional Study Using Data Accumulated in a Japanese Food-Logging Mobile Health Application
Source: MDPI journal article supplement (doi:10.3390/nu15092165), 2023-04-30
Supplement: s1 [file s1]

**Table S1.** Association between chronotype/SJL and % nutrient intake in the breakfast/total daily intake by multiple regression analyses.

| Dependent variable   | Independent variable: chronotype |        |         |        |         | Independent variable: SJL |        |        |        |         |
|----------------------|----------------------------------|--------|---------|--------|---------|---------------------------|--------|--------|--------|---------|
| % ratio in breakfast | R2                               | B      | Min     | Max    | P value | R2                        | B      | Min    | Max    | P value |
| Protein              | 0.036                            | -2.416 | -2.783  | -2.048 | <.001   | 0.009                     | -1.19  | -1.567 | -0.812 | <.001   |
| Lipid                | 0.031                            | -2.156 | -2.518  | -1.794 | <.001   | 0.008                     | -0.941 | -1.312 | -0.57  | <.001   |
| Carbohydrate         | 0.045                            | -2.547 | -2.899  | -2.195 | <.001   | 0.008                     | -0.88  | -1.243 | -0.516 | <.001   |
| Sodium               | 0.031                            | -2.415 | -2.829  | -2.001 | <.001   | 0.008                     | -0.904 | -1.328 | -0.481 | <.001   |
| Potassium            | 0.039                            | -2.45  | -2.871  | -2.029 | <.001   | 0.017                     | -1.196 | -1.625 | -0.767 | <.001   |
| Cholesterol          | 0.003                            | -4.405 | -10.659 | 1.85   | 0.167   | 0.003                     | -0.685 | -7.012 | 5.641  | 0.832   |
| Fiber                | 0.023                            | -2.559 | -3.042  | -2.075 | <.001   | 0.005                     | -1.156 | -1.651 | -0.661 | <.001   |
| Saturated fatty acid | 0.03                             | -2.093 | -2.505  | -1.682 | <.001   | 0.014                     | -0.948 | -1.369 | -0.527 | <.001   |
| Alcohol              | 0.005                            | -1.222 | -1.809  | -0.635 | <.001   | 0.003                     | -0.758 | -1.353 | -0.163 | 0.013   |
| Calcium              | 0.028                            | -2.256 | -2.821  | -1.692 | <.001   | 0.017                     | -0.838 | -1.414 | -0.262 | 0.004   |
| Magnesium            | 0.029                            | -2.287 | -2.739  | -1.835 | <.001   | 0.012                     | -0.999 | -1.461 | -0.536 | <.001   |
| Phosphorus           | 0.051                            | -2.69  | -3.068  | -2.311 | <.001   | 0.018                     | -1.175 | -1.565 | -0.785 | <.001   |
| Iron                 | 0.014                            | -2.478 | -3.103  | -1.852 | <.001   | 0.001                     | -0.904 | -1.543 | -0.266 | 0.006   |
| Zinc                 | 0.018                            | -2.305 | -2.839  | -1.771 | <.001   | 0.004                     | -0.729 | -1.274 | -0.183 | 0.009   |
| Vitamin A            | 0.017                            | -2.252 | -2.996  | -1.508 | <.001   | 0.01                      | -0.614 | -1.371 | 0.144  | 0.112   |
| Vitamin D            | 0.013                            | -2.551 | -3.374  | -1.729 | <.001   | 0.006                     | -0.628 | -1.465 | 0.209  | 0.142   |
| Vitamin E            | 0.021                            | -2.941 | -3.701  | -2.182 | <.001   | 0.01                      | -0.968 | -1.742 | -0.194 | 0.014   |
| Vitamin K            | 0.031                            | -4.059 | -4.795  | -3.322 | <.001   | 0.01                      | -1.752 | -2.506 | -0.997 | <.001   |
| Vitamin B1           | 0.009                            | -2.526 | -3.435  | -1.616 | <.001   | 0.003                     | -0.628 | -1.553 | 0.297  | 0.184   |
| Vitamin B2           | 0.013                            | -2.711 | -3.576  | -1.847 | <.001   | 0.006                     | -0.983 | -1.863 | -0.103 | 0.029   |
| Vitamin B3           | 0.02                             | -2.468 | -3.05   | -1.886 | <.001   | 0.008                     | -0.966 | -1.56  | -0.372 | 0.001   |
| Vitamin B6           | 0.007                            | -2.057 | -2.928  | -1.186 | <.001   | 0.003                     | -0.826 | -1.711 | 0.059  | 0.067   |
| Vitamin B12          | 0.005                            | -1.728 | -2.461  | -0.996 | <.001   | 0.001                     | -0.514 | -1.258 | 0.231  | 0.176   |
| Folate               | 0.019                            | -2.429 | -3.04   | -1.818 | <.001   | 0.008                     | -0.88  | -1.503 | -0.257 | 0.006   |
| Vitamin B5           | 0.019                            | -2.655 | -3.335  | -1.975 | <.001   | 0.009                     | -1.12  | -1.814 | -0.427 | 0.002   |
| Vitamin C            | 0.008                            | -1.837 | -2.747  | -0.928 | <.001   | 0.005                     | -0.724 | -1.647 | 0.2    | 0.125   |

Multiple regression analyses were conducted with each nutrient intake amount (% breakfast/daily total) as a dependent variable and chronotype (1: morning, 2: intermediate, and 3: evening) or SJL (1: small SJL, 2: medium SJL, and 3: large SJL) as an independent variable in each calculation. Age, gender, BMI, and total daily intake were sed as confounding factors. Significant P-values of the independent variable (chronotype or SJL) are presented in bold (P < 0.001).

**Table S2.** Association between chronotype/SJL and % nutrient intake in dinner/total daily intake by multiple regression analyses.

| Dependent variable   | Independent variable: chronotype |       |        |       |         | Independent variable: SJL |       |        |       |         |
|----------------------|----------------------------------|-------|--------|-------|---------|---------------------------|-------|--------|-------|---------|
|                      | R2                               | B     | Min    | Max   | P value | R2                        | B     | Min    | Max   | P value |
| % ratio in dinner    |                                  |       |        |       |         |                           |       |        |       |         |
| Protein              | 0.036                            | 1.806 | 1.406  | 2.206 | <.001   | 0.026                     | 1.118 | 0.71   | 1.526 | <.001   |
| Lipid                | 0.036                            | 1.51  | 1.084  | 1.936 | <.001   | 0.028                     | 0.668 | 0.234  | 1.103 | 0.003   |
| Carbohydrate         | 0.058                            | 2.395 | 2.039  | 2.751 | <.001   | 0.027                     | 0.814 | 0.447  | 1.182 | <.001   |
| Sodium               | 0.026                            | 2.28  | 1.838  | 2.723 | <.001   | 0.007                     | 0.82  | 0.367  | 1.273 | <.001   |
| Potassium            | 0.024                            | 1.738 | 1.313  | 2.164 | <.001   | 0.012                     | 0.74  | 0.307  | 1.173 | <.001   |
| Cholesterol          | 0.025                            | 1.498 | 0.784  | 2.213 | <.001   | 0.025                     | 1.435 | 0.711  | 2.16  | <.001   |
| Fiber                | 0.028                            | 2.138 | 1.702  | 2.573 | <.001   | 0.012                     | 0.954 | 0.51   | 1.397 | <.001   |
| Saturated fatty acid | 0.045                            | 1.477 | 1.016  | 1.938 | <.001   | 0.038                     | 0.682 | 0.212  | 1.153 | 0.005   |
| Alcohol              | 0.017                            | 0.251 | -0.905 | 1.408 | 0.67    | 0.018                     | 1.099 | -0.077 | 2.274 | 0.067   |
| Calcium              | 0.005                            | 0.534 | 0.058  | 1.01  | 0.028   | 0.005                     | 0.55  | 0.067  | 1.033 | 0.026   |
| Magnesium            | 0.012                            | 1.463 | 1.02   | 1.905 | <.001   | 0.006                     | 0.818 | 0.367  | 1.268 | <.001   |
| Phosphorus           | 0.037                            | 2.078 | 1.688  | 2.468 | <.001   | 0.019                     | 1.008 | 0.608  | 1.408 | <.001   |
| Iron                 | 0.016                            | 1.597 | 1.046  | 2.147 | <.001   | 0.012                     | 0.991 | 0.431  | 1.551 | <.001   |
| Zinc                 | 0.015                            | 2.037 | 1.501  | 2.573 | <.001   | 0.004                     | 0.536 | -0.011 | 1.083 | 0.055   |
| Vitamin A            | 0.007                            | 2.005 | 1.26   | 2.75  | <.001   | 0.003                     | 1.14  | 0.382  | 1.898 | 0.003   |
| Vitamin D            | 0.006                            | 1.448 | 0.625  | 2.272 | <.001   | 0.004                     | 0.72  | -0.117 | 1.556 | 0.092   |
| Vitamin E            | 0.005                            | 1.628 | 1.009  | 2.246 | <.001   | 0.001                     | 0.852 | 0.223  | 1.481 | 0.008   |
| Vitamin K            | 0.02                             | 3.292 | 2.563  | 4.022 | <.001   | 0.008                     | 1.765 | 1.019  | 2.51  | <.001   |
| Vitamin B1           | 0.006                            | 1.108 | 0.341  | 1.875 | 0.005   | 0.005                     | 0.681 | -0.098 | 1.46  | 0.087   |
| Vitamin B2           | 0.002                            | 0.905 | 0.202  | 1.608 | 0.012   | 0.002                     | 0.672 | -0.042 | 1.385 | 0.065   |
| Vitamin B3           | 0.01                             | 1.803 | 1.247  | 2.358 | <.001   | 0.004                     | 1.006 | 0.44   | 1.571 | <.001   |
| Vitamin B6           | 0.008                            | 0.751 | -0.009 | 1.512 | 0.053   | 0.008                     | 0.795 | 0.023  | 1.568 | 0.043   |
| Vitamin B12          | 0.013                            | 1.933 | 1.132  | 2.734 | <.001   | 0.009                     | 0.911 | 0.096  | 1.726 | 0.028   |
| Folate               | 0.009                            | 1.691 | 1.108  | 2.273 | <.001   | 0.004                     | 0.848 | 0.255  | 1.442 | 0.005   |
| Vitamin B5           | 0.005                            | 1.394 | 0.825  | 1.964 | <.001   | 0.002                     | 0.922 | 0.344  | 1.501 | 0.002   |
| Vitamin C            | 0.001                            | 0.329 | -0.453 | 1.111 | 0.41    | 0.001                     | 0.497 | -0.297 | 1.291 | 0.22    |

Multiple regression analyses were conducted with each nutrient intake amount (% dinner/daily total) as a dependent variable and chronotype (1: morning, 2: intermediate, and 3: evening) or SJL (1: small SJL, 2: medium SJL, and 3: large SJL) as an independent variable in each calculation. Age, gender, BMI, and total daily intake were sed as confounding factors. Significant P-values of the independent variable (chronotype or SJL) are presented in bold (P < 0.001).

**Table S3.** Association between BMI and chronotype or SJL.

| Dependent variable | Adjusted R squared | <i>p</i> value | Explanatory variable | Standardization coefficient $\beta$ | <i>p</i> value | 95% CI for B |         |
|--------------------|--------------------|----------------|----------------------|-------------------------------------|----------------|--------------|---------|
|                    |                    |                |                      |                                     |                | minimum      | maximum |
| BMI                | 0.017              | <.001          | Gender               | -0.107                              | <.001          | -2.317       | -1.324  |
|                    |                    |                | Age                  | 0.057                               | <.001          | 0.019        | 0.062   |
|                    |                    |                | Chronotype           | 0.057                               | <.001          | 0.304        | 0.969   |
| BMI                | 0.014              | <.001          | Gender               | -0.104                              | <.001          | -2.268       | -1.276  |
|                    |                    |                | Age                  | 0.046                               | 0.002          | 0.012        | 0.054   |
|                    |                    |                | SJL                  | 0.026                               | 0.076          | -0.032       | 0.644   |

Multiple regression analyses were conducted with BMI as a dependent variable and chronotype (1: morning, 2: intermediate, and 3: evening) or SJL (1: small SJL, 2: medium SJL, and 3: large SJL) as an independent variable in each calculation. Age, gender, BMI, and total daily intake were sed as confounding factors.
